# Supplementary material
Source: publisher figshare collection journal article supplement (https://acs.figshare.com/ndownloader/files/20280450)
Supplement: Supplementary file 1 [file 20280450]

---

## Supporting Information

### **Thiolated Nanoparticles Overcome the Mucus Barrier and Epithelial Barrier for Oral Delivery of Insulin**

Shurong Zhou<sup>†</sup>, Hailiang Deng<sup>†</sup>, Yang Zhang<sup>†</sup>, Peiyao Wu<sup>†</sup>, Bing He<sup>†,§</sup>, Wenbing Dai<sup>†</sup>, Hua Zhang<sup>†</sup>, Qiang Zhang<sup>†,§</sup>, Rongsheng Zhao<sup>\*,‡</sup>, Xueqing Wang<sup>\*,†</sup>

<sup>†</sup> Beijing Key Laboratory of Molecular Pharmaceutics, New Drug Delivery Systems, School of Pharmaceutical Sciences and <sup>§</sup> State Key Laboratory of Natural and Biomimetic Drugs, Peking University, Beijing 100191, China

<sup>‡</sup> Department of Pharmacy, Peking University Third Hospital, Beijing 100191, China

---

## **1. Methods**

### **1.1 Cell viability**

The cell viability after incubation with CS NPs and PC6/CS NPs was also evaluated by CCK-8 kits on Caco-2 cells. Briefly, we incubated Caco-2 cells with CS NPs (CS concentration was 3 mg/ml) and PC6/CS NPs (CS concentration was 3mg/ml and PC6 concentration was 0.1mg/ml, 0.2 mg/ml and 0.5 mg/ml respectively) for 2 h and tested the cell viability using CCK-8 kits.

### **1.2 Bioactivity of insulin loaded in CS NPs and PC6/CS NPs**

The bioactivity of insulin loaded in CS NPs and PC6/CS NPs with a final insulin concentration of 50 µg/ml was tested using CD spectrum (Circular Dichroism Spectrophotometer, Jasco, Japan). Standard insulin solution was prepared by dissolving free insulin with the same concentration.

### **1.3 Particle stability of CS NPs and PC6/CS NPs**

In order to evaluate the stability of CS NPs and PC6/CS NPs at different pH, the morphology of CS NPs and PC6/CS NPs incubated in PBS at pH 5.0, 6.8 and 7.4 respectively was observed by TEM.

### **1.4 Release of insulin from CS NPs and PC6/CS NPs**

200 µl NPs solution loading FITC-insulin with a final FITC-insulin concentration of 50 µg/ml was added into dialysis bag (Mw: 8000-14000 Da) and incubated in 20 ml PBS with different pH (5.0, 6.8, 7.4) at 37°C, 110 rpm. 200 µl dialysis medium was collected and replaced by the blank PBS with the same volume at different time intervals. Collected samples were used to analyze the release of FITC-insulin from CS NPs and PC6/CS NPs and determined by fluorescence spectrophotometer.

## **2. Figures**

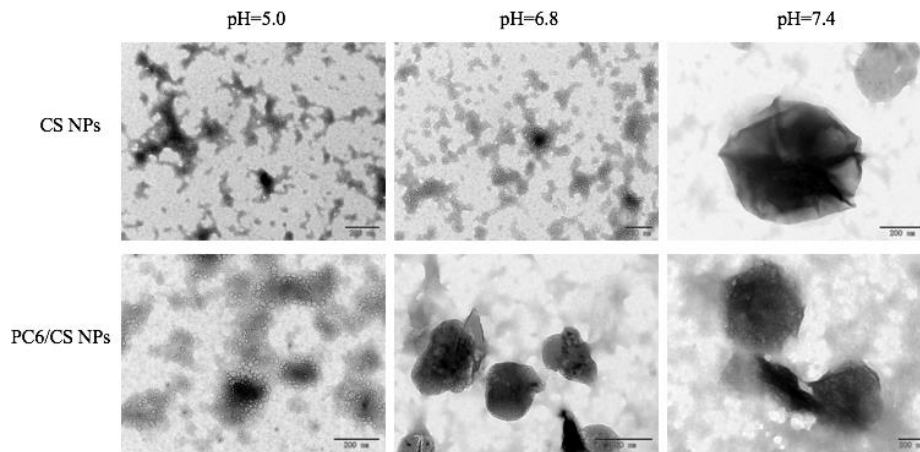

Figure S1. The morphology of CS NPs and PC6/CS NPs (unstained with phosphotungstic acid) observed by TEM after dispersed in PBS with different pH for 30 min.

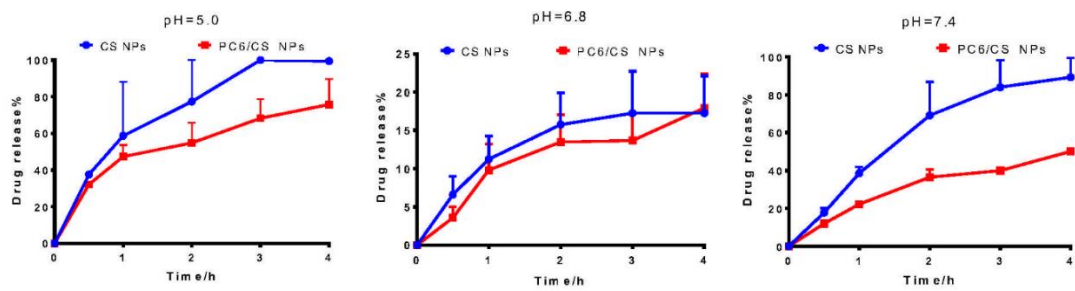

Figure S2. The release profile of insulin from PC6/CS NPs compared with that from CS NPs at different pH.
